# Supplementary material for: Role of polyethylene glycol to alleviate lead stress in Raphanus sativus
Source: PeerJ journal article supplement (doi:10.7717/peerj.18147), 2025-01-09
Supplement: Supplementary_material.zip [file Complete data for Pb.xlsx]

## Sheet: Sheet3
Treatment		Replicates	RL	SL	RFW	SFW	RDW	SDW	SC	PR	TR	total soluble protein	POD	SOD	CAT	HP	chl a	chl b	Tchl	Caro	Pods/pla	Seeds/pod	GP%	SVI	N	P	K
Control		1	7.2	6.5	0.23	0.36	0.044	0.051	1.35	38	1.12	1.48	79	164	2.6	2.9	0.97	0.56	1.613	3.58	8	11	0.7	9.8	41.4	11.7	45.5
Control		2	7.6	5.6	0.35	0.33	0.041	0.05	1.38	39	1.18	1.52	78	167	2.5	2.6	0.98	0.53	1.64	4.02	10	9	0.68	8.7	42.8	11.4	42.6
Control		3	8.2	7.1	0.36	0.28	0.042	0.054	1.42	43	1.21	1.54	79	165	2.3	2.8	0.96	0.57	1.6033	3.59	11	10	0.71	9.472	40.7	12	41.4
Pb 75mg/kg		1	5.6	3.6	0.16	0.23	0.028	0.032	0.72	18	0.73	0.63	113	310	3.8	4.9	0.47	0.26	0.74	2.11	3	3	0.366	3.4404	23.6	6.4	30.3
Pb 75mg/kg		2	5.2	4.2	0.21	0.21	0.027	0.028	0.82	20	0.76	0.64	115	306	3.7	4.8	0.37	0.29	0.75	2.08	3	2	0.3892	4.264	25.3	6.8	29.1
Pb 75mg/kg		3	4.7	5.1	0.25	0.24	0.024	0.029	0.79	23	0.71	0.59	112	307	3.9	5.1	0.39	0.31	0.7866	2.09	4	5	0.3214	3.915	21.7	6.9	32.6
PEG 10%		1	7.4	4.1	0.27	0.24	0.037	0.034	0.89	28	0.86	0.82	84	251	3.9	3.2	0.81	0.39	1.21	4.52	5	6	0.6	6.96	27.5	8.6	35.9
PEG 10%		2	7.1	5.1	0.24	0.29	0.032	0.036	0.86	29	0.84	0.84	87	249	4.1	3.1	0.78	0.36	1.24	4.58	6	7	0.57	7.339	25.8	8.8	32.2
PEG 10%		3	6.9	4.5	0.27	0.27	0.034	0.038	0.91	31	0.89	0.89	85	245	4.2	2.9	0.82	0.37	1.23666	4.55	7	8	0.61	6.58	30.2	8.2	37.5
PEG 20%		1	7.3	5	0.26	0.27	0.041	0.032	0.96	32	0.94	0.97	91	203	4.2	3.5	0.84	0.41	1.38	4.79	7	10	0.666	8.325	33.2	9.8	40.2
PEG 20%		2	7.6	4.8	0.29	0.29	0.039	0.034	0.92	34	0.96	0.99	94	198	4.4	3.2	0.86	0.38	1.36	4.72	7	9	0.6943	7.5713	31.8	9.9	38.8
PEG 20%		3	6.8	6.3	0.31	0.28	0.042	0.03	0.98	31	0.98	1.01	92	201	4.3	3.4	0.89	0.39	1.33667	4.75	8	8	0.6477	8.64	35.5	9.5	40.7
PEG 30%		1	7.1	6.3	0.21	0.38	0.038	0.054	1.28	37	0.98	1.26	102	189	5.2	3.8	1.09	0.42	1.64	4.88	10	12	0.833	11.2455	39.7	10.5	46.8
PEG 30%		2	7.4	6.2	0.28	0.34	0.042	0.051	1.21	36	0.99	1.32	105	187	5.5	3.8	1.08	0.45	1.66	4.91	9	10	0.8719	10.97	41.4	10.8	42.2
PEG 30%		3	7.9	6	0.32	0.29	0.047	0.056	1.19	39	1.14	1.31	103	185	5.4	3.7	1.12	0.48	1.61667	4.93	11	11	0.84	11.43	42.2	10.7	49.9
PEG 40%		1	6.3	4.4	0.25	0.28	0.037	0.041	1.06	31	0.77	0.91	109	213	4.8	3.6	0.67	0.36	1.66	3.16	5	4	0.666	7.2594	29.1	7.2	32.1
PEG 40%		2	6.7	4.2	0.28	0.28	0.034	0.036	1.02	28	0.81	0.87	110	212	4.6	3.4	0.72	0.31	1.64	3.12	7	7	0.687	7.69	24.9	7.7	28.8
PEG 40%		3	6.5	4.7	0.27	0.31	0.028	0.039	1.08	27	0.84	0.85	109	217	4.9	3.7	0.69	0.32	1.62333	3.15	8	3	0.602	7.836	26.7	7.9	30.6
Pb 75mg/kg +PEG 10%		1	7.3	5.1	0.26	0.28	0.035	0.042	0.81	22	0.84	0.78	88	281	4.4	3.4	0.65	0.33	1.17	3.89	5	6	0.5666	7.13916	36.8	10.8	36.6
Pb 75mg/kg +PEG 10%		2	7.2	5.4	0.27	0.29	0.031	0.044	0.87	25	0.88	0.79	87	279	4.2	3.2	0.69	0.34	1.15	3.92	5	8	0.584	6.8874	37.4	10.2	33.7
Pb 75mg/kg +PEG 10%		3	7.1	5.7	0.24	0.31	0.03	0.049	0.89	24	0.91	0.81	88	278	4.1	3.1	0.71	0.36	1.11667	3.94	7	8	0.55	7.3914	39.9	10.6	34.9
Pb 75mg/kg+PEG 20%		1	7.4	6.1	0.26	0.29	0.037	0.041	1.02	29	0.93	1.12	97	307	5.1	3.7	0.91	0.39	1.28	4.32	6	8	0.6666	8.9991	38.3	11.1	41.8
Pb 75mg/kg+PEG 20%		2	7.9	5.5	0.26	0.31	0.039	0.048	1.07	27	0.95	1.08	97	308	4.9	3.6	0.82	0.41	1.31	4.39	6	9	0.6271	9.3324	42.7	11.4	42.7
Pb 75mg/kg+PEG 20%		3	6.8	7	0.27	0.32	0.034	0.051	1.11	31	0.99	1.09	96	310	5	3.5	0.92	0.3	1.34	4.41	9	10	0.6488	8.673	40.2	11.7	44.6
Pb 75mg/kg +PEG 30%		1	7.3	7.2	0.24	0.37	0.04	0.051	1.31	39	1.18	1.39	108	298	5.9	4.1	1.08	0.51	1.68	4.79	9	13	0.8	11.76	44.9	12.2	47.5
Pb 75mg/kg +PEG 30%		2	7.8	7	0.29	0.34	0.049	0.052	1.39	42	1.19	1.37	107	292	5.8	4.2	1.04	0.49	1.64	4.83	10	14	0.8592	11.98	48.8	12.8	51.3
Pb 75mg/kg +PEG 30%		3	8.1	6.8	0.32	0.32	0.051	0.054	1.37	43	1.21	1.43	109	296	6	4.4	1.11	0.53	1.66	4.81	12	12	0.872	11.321	50.1	12.7	49.9
Pb 75mg/kg +PEG 40%		1	6.8	3.5	0.25	0.29	0.035	0.044	1.19	30	0.87	1.04	117	211	5.1	3.8	0.61	0.31	1.08	4.67	7	6	0.6333	6.45966	37.2	7.7	31.4
Pb 75mg/kg +PEG 40%		2	6.7	3.8	0.24	0.31	0.028	0.045	1.12	32	0.92	1.07	116	210	5.2	3.9	0.62	0.37	1.03	4.63	6	5	0.6011	6.8531	32.7	7.2	34.7
Pb 75mg/kg +PEG 40%		3	6.4	4.5	0.27	0.32	0.031	0.039	1.24	27	0.94	1.09	117	214	5.3	4.1	0.69	0.36	1.04	4.65	8	7	0.586	7.1322	30.8	7.8	29.8
